# Supplementary material for: Effect of dolomite and biochar addition on N2O and CO2 emissions from acidic tea field soil
Source: PLoS One. 2018 Feb 2;13(2):e0192235. doi: 10.1371/journal.pone.0192235 (PMC5796709; doi:10.1371/journal.pone.0192235)
Supplement: S1 Table — (DOCX) [file pone.0192235.s001.docx]

S1 Table. Basic properties of different biochar

| Biochar | Surface area (BET) m2/g | pH (1:5 H2O) | Total C  (g kg-1) | Total N  (g kg-1) | C:N  ratio | NH4+-N  (mg kg-1), | NO3--N  (mg kg-1) |
| --- | --- | --- | --- | --- | --- | --- | --- |
| Rice husk (RH) | 52.6 | 8.2 | 361.9 | 5.7 | 63.5 | nd*a* | nd |
| Sawdust (SD) | 25.2 | 8.7 | 372.4 | 3.3 | 112.5 | nd | nd |
| Bamboo (BB) | 89.3β | 8.2 | 424.8 | 1.8 | 236 | 1.4 | 17.1 |

*a* below limit of detection,

β Yoshizawa S. Biochar for carbon storage in the soil and for soil improvement. TANSO. 2015. 270, 232-240. (in Japanese with English abstract).
